# Supplementary material
Source: ML conference proceedings conference paper supplement (https://openreview.net/forum?id=Kb5tkksOcN)
Supplement: supplementary_material [file Hypothesis_Generator_Liner.pdf › supplement_material/evidence/Hypothesis_Generator_Liner.pdf]

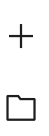

LLM과 인과추론 모듈을 기반으로 약물 부작용 인과추론에 대한 연구

그래프 신경망 기반 약물 상호작용 네트워크와 LLM의 contextual reasoning을 결합한 모델은 단일 약물 중심 접근법보다 다중 약물 복용 시나리오에서 발생하는 복합적 부작용 패턴의 인과관계를 더 정확하게 식별하고 예측할 수 있을 것이다.

연구 가치 높음

Pearl의 인과계층구조를 기반으로 한 이중강건추정량(doubly robust estimator)과 그래프 조건화된 대형언어모델을 결합한 하이브리드 시스템은 기존의 단일 약물 중심 또는 순수 상관관계 기반 접근법에 비해 다중약물 복용 환경에서 발생하는 emergent 부작용 패턴의 인과관계를 통계적으로 유의하게 더 정확하고 해석가능하게 식별할 수 있으며, 이는 임상적으로 검증 가능한 개인화된 약물안전성 평가를 가능하게 할 것이다.

연구 가치 높음

가설 보완하기

시간적 주의집중 메커니즘(temporal attention mechanism)을 가진 transformer 기반 LLM과 동적 인과발견 모듈을 결합한 하이브리드 모델은 기존의 정적 인과추론 방법들보다 시간 경과에 따른 약물-부작용 인과관계의 동적 변화를 더 정확하게 포착하고 예측할 수 있을 것이다.

가설 보완하기

LLM 기반 개인별 시계열 약물 노출-생체지표 통합 모델과 동적 인과추론 프레임워크를 결합한 시스템은 기존 인구집단 기반 정적 예측 모델보다 개인 환자의 약물 부작용 발생 시점과 중증도를 더 정확하게 예측하고, 부작용 발생 전 조기 위험 신호를 탐지하여 예방적 개입을 가능하게 할 것이다.

연구 가치 높음

가설 보완하기

의학적 지식 그래프와 counterfactual reasoning을 통합한 설명가능한 LLM-인과추론 하이브리드 모델은 약물-부작용 인과관계 예측에서 기존 모델들과 유사한 정확도를 유지하면서도 임상진료에 더 해석가능하고 실행가능한 인사이트를 제공할 수 있을 것이다.

가설 보완하기
